# Supplementary material for: Preventing Preeclampsia via the targeted Inhibition of Procoagulant Platelets
Source: Research Square preprint supplement (doi:10.21203/rs.3.rs-5312109/v1), 2024-12-19
Supplement: Supplementary file 2 [file c28ea26d4c0087391f4cf252.docx]

**Table 1** Comparisions of procoagulant platelets level of three groups

| Groups | Procoagulant platelets /%  [M (P25, P75)] | |
| --- | --- | --- |
| Resting | Activated |
| Healthy non-pregnant women (n=59) | 0.30 (0.20-0.60) | 3.90 (3.10-5.20) |
| Healthy pregnant women (n=49) | 1.40 (1.15-1.60) | 8.90 (8.05-9.50) |
| Pregnant women with PE (n=39) | 2.30 (1.90-2.90) | 16.90 (15.30-18.50) |
| *P*a | <.001 | <.001 |
| *P*b | <.001 | <.001 |
| *P*c | <.001 | <.001 |

a: Healthy non-pregnant women vs. Healthy pregnant women; b: Healthy non-pregnant women vs. Pregnant women with PE; c: Healthy pregnant women vs. Pregnant women with PE, **P*<.05. PE: preeclampsia.

**Table 2** Downregulated proteins in resting state (Pregnant women with PE/Healthy pregnant women, *P*<.05)

| **Uniprot ID** | **Protein name** | **Gene name** | **Fold change** | ***P* value** | **Function** |
| --- | --- | --- | --- | --- | --- |
| P02671 | Fibrinogen alpha chain | FGA | 0.555 | 9.06E-03 | Involved in adaptive immune response and blood coagulation. |
| P01024 | Complement C3 | C3 | 0.443 | 4.20E-02 | Involved in immune and inflammatory response, complement activation and apoptotic process. |
| P02774 | Vitamin D-binding protein | GC | 0.403 | 2.89E-02 | Involved in vitamin D transport and storage, scavenging of extracellular G-actin, enhancement of the chemotactic activity of C5 alpha for neutrophils in inflammation and macrophage activation. |
| P02749 | Beta-2-glycoprotein 1 | APOH | 0.452 | 2.03E-02 | Implicated in a variety of physiologic pathways including lipoprotein metabolism, coagulation, and the production of antiphospholipid autoantibodies. |
| P01042 | Kininogen-1 | KNG1 | 0.489 | 3.91E-02 | Involved in blood coagulation, inflammatory response and killing of cells of other organism. |
| P21283 | V-type proton ATPase subunit C 1 | ATP6V1C1 | 0.106 | 4.13E-02 | Mediates proton transmembrane transport and regulation of macroautophagy. |
| P62873 | Guanine nucleotide-binding protein G(I)/G(S)/G(T) subunit beta-1 | GNB1 | 0.168 | 1.15E-03 | Involved as a modulator or transducer in various transmembrane signaling systems. |
| O43432 | Eukaryotic translation initiation factor 4 gamma 3 | EIF4G3 | 0.374 | 4.73E-02 | Mediates mRNA binding and RNA cap binding. |
| P00747 | Plasminogen | PLG | 0.470 | 2.12E-02 | Dissolves the fibrin of blood clots and acts as a proteolytic factor in a variety of other processes including embryonic development, tissue remodeling, tumor invasion, and inflammation. |
| P23142 | Fibulin-1 | FBLN1 | 0.482 | 3.62E-02 | Mediates blood coagulation, fibrin clot formation and embryo implantation |
| P01769 | Immunoglobulin heavy variable 3-30 | IGHV3-30 | 0.067 | 3.22E-02 | Mediates B cell receptor signaling pathway and complement activation, classical pathway. |
| Q14520 | Hyaluronan-binding protein 2 | HABP2 | 0.447 | 2.81E-02 | Mediates cell adhesion and proteolysis. |
| Q13790 | Apolipoprotein F | APOF | 0.493 | 3.22E-02 | Mediates cholesterol binding and lipid transporter activity. |
| P01598 | Immunoglobulin kappa variable 1-5 | IGKV1-5 | 0.244 | 2.81E-02 | Involved in adaptive immune response. |
| P05546 | Heparin cofactor 2 | SERPIND1 | 0.332 | 3.41E-02 | Involved in blood coagulation, chemotaxis and negative regulation of endopeptidase activity. |
| P00748 | Coagulation factor XII | F12 | 0.363 | 9.10E-05 | Involved in blood coagulation (intrinsic pathway) and Factor XII activation. |
| P03952 | Plasma kallikrein | KLKB1 | 0.383 | 3.52E-02 | Mediates blood coagulation, Factor XII activation and fibrinolysisformation. |
| P23083 | Immunoglobulin heavy variable 1-2 | IGHV1-2 | 0.291 | 3.88E-02 | Involved in defense response to bacterium and immune response. |
| O75791 | GRB2-related adapter protein 2 | GRAP2 | 0.444 | 4.15E-02 | Involved in cell-cell signaling and Ras protein signal transduction. |
| Q9UGM5 | Fetuin-B | FETUB | 0.260 | 2.63E-02 | Involved in negative regulation of endopeptidase activity and single fertilization. |
| P01699 | Immunoglobulin lambda variable 1-44 | IGLV1-44 | 0.199 | 3.47E-02 | Mediates antigen binding and immune response |
| Q8N335 | Glycerol-3-phosphate dehydrogenase 1-like protein | GPD1L | 0.381 | 2.89E-02 | Plays a role in regulating cardiac sodium current and positive regulation of sodium ion transport. |
| Q32MZ4 | Leucine-rich repeat flightless-interacting protein 1 | LRRFIP1 | 0.407 | 3.11E-02 | May regulate expression of TNF, EGFR and PDGFA. |
| P14209 | CD99 antigen | CD99 | 0.467 | 1.33E-02 | Mediates homotypic cell-cell adhesion and positive regulation of neutrophil extravasation and T cell extravasation |
| Q8N490 | Probable hydrolase PNKD | PNKD | 0.179 | 4.71E-03 | Probable hydrolase that plays an aggravative role in the development of cardiac hypertrophy via activation of the NF-kappa-B signaling pathway. |
| Q14353 | Guanidinoacetate N-methyltransferase | GAMT | 0.284 | 7.31E-03 | Important in nervous system development. |
| Q15582 | Transforming growth factor-beta-induced protein ig-h3 | TGFBI | 0.309 | 8.12E-03 | Plays a role in cell adhesion and may play a role in cell-collagen interactions. |
| Q99704 | Docking protein 1 | DOK1 | 0.299 | 1.55E-02 | Modulates integrin activation by competing with talin for the same binding site on ITGB3. |
| P34810 | Macrosialin | CD68 | 0.154 | 2.39E-02 | Mediates inflammatory response to antigenic stimulus and negative regulation of dendritic cell antigen processing and presentation |
| O75460 | Serine/threonine-protein kinase/endoribonuclease IRE1 | ERN1 | 0.320 | 3.03E-02 | Involved inADP binding, endoribonuclease activity and enzyme binding. |
| P04206 | Immunoglobulin kappa variable 3-20 | IGKV3-20 | 0.149 | 4.33E-04 | Mediates adaptive immune response, antibacterial humoral response, glomerular filtration and immune response. |
| O75534 | Cold shock domain-containing protein E1 | CSDE1 | 0.299 | 7.43E-03 | Involved in regulation of translational initiation and stress granule assembly. |
| P03923 | NADH-ubiquinone oxidoreductase chain 6 | MT-ND6 | 0.228 | 4.41E-02 | Core subunit of the mitochondrial membrane respiratory chain NADH dehydrogenase (Complex I) which catalyzes electron transfer from NADH through the respiratory chain, using ubiquinone as an electron acceptor. |
| O60664 | Perilipin-3 | PLIN3 | 0.255 | 3.94E-02 | Required for the transport of mannose 6-phosphate receptors (MPR) from endosomes to the trans-Golgi network. |
| Q01968 | Inositol polyphosphate 5-phosphatase OCRL | OCRL | 0.133 | 1.55E-02 | Regulates traffic in the endosomal pathway by regulating the specific pool of phosphatidylinositol 4,5-bisphosphate that is associated with endosomes |
| Q04323 | UBX domain-containing protein 1 | UBXN1 | 0.518 | 2.86E-02 | ATPase binding. |
| Q9Y4P1 | Cysteine protease ATG4B | ATG4B | 0.335 | 4.99E-02 | Positive regulation of protein catabolic process and protein delipidation. |
| Q92692 | Nectin-2 | NECTIN2 | 0.422 | 4.45E-02 | Modulator of T-cell signaling. Can be either a costimulator of T-cell function, or a coinhibitor, depending on the receptor it binds to. |
| Q15386 | Ubiquitin-protein ligase E3C | UBE3C | 0.056 | 4.59E-02 | Involved in protein polyubiquitination. |
| P27482 | Calmodulin-like protein 3️ | CALML3 | 0.391 | 3.14E-02 | May function as a specific light chain of unconventional myosin-10 (MYO10), also enhances MYO10 translation, possibly by acting as a chaperone for the emerging MYO10 heavy chain protein and may compete with calmodulin by binding, with different affinities, to cellular substrates. |
| O14920 | Inhibitor of nuclear factor kappa-B kinase subunit beta | IKBKB | 0.203 | 2.76E-02 | Involved in IkappaB kinase activity, protein heterodimerization activity and protein homodimerization activity. |
| Q92854 | Semaphorin-4D | SEMA4D | 0.146 | 1.31E-02 | Positive regulation of collateral sprouting , GTPase activity and positive regulation of inhibitory synapse assembly. |
| Q8N0U8 | Vitamin K epoxide reductase complex subunit 1-like protein 1 | VKORC1L1 | 0.203 | 1.07E-02 | Involved in vitamin K metabolism. |
| P98172 | Ephrin-B1 | EFNB1 | 0.380 | 4.63E-02 | cell surface transmembrane ligand for Eph receptors, a family of receptor tyrosine kinases which are crucial for migration, repulsion and adhesion during neuronal, vascular and epithelial development. |
| O60674 | Tyrosine-protein kinase JAK2 | JAK2 | 0.030 | 2.44E-03 | Negative regulation of cell-cell adhesion and negative regulation of cell population proliferation. |
| P10646 | Tissue factor pathway inhibitor | TFPI | 0.401 | 4.82E-02 | Inhibits factor X (X(a)) directly and, in a Xa-dependent way, inhibits VIIa/tissue factor activity, presumably by forming a quaternary Xa/LACI/VIIa/TF complex. |
| Q06481 | Amyloid beta precursor like protein 2 | APLP2 | 0.274 | 4.46E-02 | May play a role in the regulation of hemostasis and the soluble form may have inhibitory properties towards coagulation factors and may interact with cellular G-protein signaling pathways. |
| P47900 | P2Y purinoceptor 1 | P2RY1 | 0.286 | 1.27E-03 | Receptor for extracellular adenine nucleotides such as ADP. |
| Q5T2D2 | Trem-like transcript 2 protein | TREML2 | 0.356 | 1.95E-02 | Involved in T cell activation. |
| Q9BYM8 | RanBP-type and C3HC4-type zinc finger-containing protein 1 | RBCK1 | 0.490 | 3.34E-02 | Involved in activation of the canonical NF-kappa-B and the JNK signaling pathways. |
| P40189 | Interleukin-6 receptor subunit beta | IL6ST | 0.216 | 3.76E-03 | Positive regulation of acute inflammatory response and adaptive immune response. |
| P08571 | Monocyte differentiation antigen CD14 | CD14 | 0.103 | 4.99E-02 | Mediates apoptotic process, cell surface receptor signaling pathway and cellular response to diacyl bacterial lipopeptide. |
| P83111 | Serine beta-lactamase-like protein LACTB, mitochondrial | LACTB | 0.136 | 1.20E-04 | Mitochondrial serine protease that acts as a regulator of mitochondrial lipid metabolism. |
| O60547 | GDP-mannose 4,6 dehydratase | GMDS | 0.420 | 4.12E-03 | Involved in 'de novo' GDP-L-fucose biosynthetic process and GDP-mannose metabolic process. |
| Q9NRW4 | Dual specificity protein phosphatase 22 | DUSP22 | 0.295 | 3.55E-02 | Activates the Jnk signaling pathway. |
| Q8N5C1 | Calcium homeostasis modulator protein 5 | CALHM5 | 0.123 | 4.43E-02 | pore-forming subunit of a voltage-gated ion channel |
| Q7L523 | Ras-related GTP-binding protein A | RRAGA | 0.119 | 4.58E-02 | May alternatively act as a cellular target for adenovirus E3-14.7K, an inhibitor of TNF-alpha functions, thereby affecting cell death. |
| Q9Y281 | Cofilin-2 | CFL2 | 0.056 | 2.22E-02 | Involved in actin filament depolymerization and actin filament fragmentation. |
| P42331 | Rho GTPase-activating protein 25 | ARHGAP25 | 0.370 | 3.69E-02 | GTPase activator for the Rho-type GTPases by converting them to an inactive GDP-bound state. |
| Q8WV99 | AN1-type zinc finger protein 2B | ZFAND2B | 0.101 | 1.93E-02 | Plays a role in protein homeostasis by regulating both the translocation and the ubiquitin-mediated proteasomal degradation of nascent proteins at the endoplasmic reticulumMet-enkephalin and dynorphin. |
| P41222 | Prostaglandin-H2 D-isomerase | PTGDS | 0.199 | 2.26E-02 | Levels are lower in pregnancies with trisomic fetuses and fetuses with renal abnormalities. |
| O75312 | Zinc finger protein ZPR1 | ZPR1 | 0.078 | 3.88E-02 | Acts as a signaling molecule that communicates proliferative growth signals from the cytoplasm to the nucleus. |
| Q9NZM3 | Intersectin-2 | ITSN2 | 0.026 | 2.08E-03 | Overexpression of this protein results in the inhibition of the transferrin uptake and the blockage of the clathrin-mediated endocytosis. |
| P49914 | 5-formyltetrahydrofolate cyclo-ligase | MTHFS | 0.386 | 9.92E-03 | Involved in ATP binding, folic acid binding and metal ion binding. |
| P51648 | Aldehyde dehydrogenase family 3 member A2 | ALDH3A2 | 0.592 | 4.18E-02 | Catalyzes the oxidation of medium and long chain aliphatic aldehydes to fatty acids. |
| Q8N573 | Oxidation resistance protein 1 | OXR1 | 0.154 | 1.73E-03 | May be involved in protection from oxidative damage. |
| Q86VB7 | Scavenger receptor cysteine-rich type 1 protein M130 | CD163 | 0.463 | 4.00E-02 | Involved in acute-phase response. |
| O00461 | Golgi integral membrane protein 4 | GOLIM4 | 0.292 | 3.12E-02 | Plays a role in endosome to Golgi protein trafficking and mediates protein transport along the late endosome-bypass pathway from the early endosome to the Golgi. |
| Q9HCP0 | Casein kinase I isoform gamma-1 | CSNK1G1 | 0.315 | 2.16E-02 | Mediates endocytosis and peptidyl-serine phosphorylation. |
| Q9H5N1 | Rab GTPase-binding effector protein 2 | RABEP2 | 0.016 | 1.08E-02 | Plays a role in membrane trafficking and in homotypic early endosome fusion. |
| Q8NBZ7 | UDP-glucuronic acid decarboxylase 1 | UXS1 | 0.128 | 1.08E-02 | Mediates D-xylose metabolic process and UDP-D-xylose biosynthetic process, |
| P01597 | Immunoglobulin kappa variable 1-39 | IGKV1-39 | 0.347 | 2.94E-03 | Involved in adaptive immune response |
| Q96DX5 | Ankyrin repeat and SOCS box protein 9 | ASB9 | 0.402 | 1.99E-02 | This protein is involved in the pathway protein ubiquitination |
| Q9NV70 | Exocyst complex component 1 | EXOC1 | 0.030 | 3.71E-02 | Component of the exocyst complex involved in the docking of exocytic vesicles with fusion sites on the plasma membrane. |
| Q15027 | Arf-GAP with coiled-coil, ANK repeat and PH domain-containing protein 1 | ACAP1 | 0.135 | 4.04E-02 | Involved in protein transport. |
| P51808 | Dynein light chain Tctex-type 3 | DYNLT3 | 0.290 | 6.28E-03 | Positive regulation of mitotic cell cycle and regulation of mitotic cell cycle. |
| P11117 | Lysosomal acid phosphatase | ACP2 | 0.395 | 1.36E-02 | Involved in dephosphorylation and lysosome organization. |
| P10586 | Receptor-type tyrosine-protein phosphatase F | PTPRF | 0.084 | 1.11E-07 | Involved in possible cell adhesion receptor and it possesses an intrinsic protein tyrosine phosphatase activity (PTPase) and dephosphorylates EPHA2 regulating its activity.. |
| Q86SZ2 | Trafficking protein particle complex subunit 6B | TRAPPC6B | 0.146 | 5.61E-04 | Regulation of GTPase activity. |
| P01614 | Immunoglobulin kappa variable 2D-40 | IGKV2D-40 | 0.429 | 4.91E-02 | Involved in adaptive immune response. |
| P01601 | Immunoglobulin kappa variable 1D-16 | IGKV1D-16 | 0.205 | 3.20E-02 | Involved in adaptive immune response. |
| Q7KZI7 | Serine/threonine-protein kinase MARK2 | MARK2 | 0.256 | 2.39E-02 | Involved in activation of protein kinase activity and autophagy of mitochondrion. |
| Q96GS4 | BLOC-1-related complex subunit 6 | BORCS6 | 0.123 | 1.27E-02 | Involved in lysosome localization. |
| P01716 | Immunoglobulin lambda variable 3-1 | IGLV3-1 | 0.181 | 4.17E-02 | Involved in adaptive immune response |
| A6NKF9 | Golgi pH regulator B | GPR89B | 0.062 | 1.11E-04 | Plays a role in lymphocyte development, probably by acting as a RABL3 effector in hematopoietic cells. |
| Q9NY97 | N-acetyllactosaminide beta-1,3-N-acetylglucosaminyltransferase 2 | B3GNT2 | 0.150 | 2.82E-02 | This protein is involved in the pathway protein glycosylation, which is part of protein modification. |
| Q7LBR1 | Charged multivesicular body protein 1b | CHMP1B | 0.154 | 1.29E-02 | Probable peripherally associated component of the endosomal sorting required for transport complex III (ESCRT-III) which is involved in multivesicular bodies (MVBs) formation and sorting of endosomal cargo proteins into MVBs. |
| P49757 | Ethanolamine-phosphate cytidylyltransferase | NUMB | 0.081 | 3.38E-02 | Regulates clathrin-mediated receptor endocytosis and plays a role in the process of neurogenesis. |
| O15027 | Protein transport protein Sec16A | SEC16A | 0.148 | 1.94E-02 | Involved in Golgi organization and  Golgi to plasma membrane CFTR protein transport. |
| Q8N6H7 | ADP-ribosylation factor GTPase-activating protein 2 | ARFGAP2 | 0.131 | 2.13E-02 | Involved in COPI coating of Golgi vesicle and protein transport. |
| O95563 | Mitochondrial pyruvate carrier 2 | MPC2 | 0.131 | 3.47E-02 | Mediates identical protein binding and pyruvate transmembrane transporter activity. |
| O75069 | Transmembrane and coiled-coil domains protein 2 | TMCC2 | 0.318 | 4.93E-02 | May be involved in the regulation of the proteolytic processing of the amyloid precursor protein (APP) possibly also implicating APOE. |
| Q5BJD5 | Transmembrane protein 41B | TMEM41B | 0.175 | 4.78E-02 | Phospholipid scramblase involved in lipid homeostasis and membrane dynamics processes. |
| Q13443 | Disintegrin and metalloproteinase domain-containing protein 9 | ADAM9 | 0.112 | 1.30E-02 | May mediate cell-cell, cell-matrix interactions and regulate the motility of cells via interactions with integrins. |
| Q6PIU2 | Neutral cholesterol ester hydrolase 1 | NCEH1 | 0.148 | 3.66E-02 | also involved in organ detoxification by hydrolyzing exogenous organophosphorus compounds (by similarity) and contribute to cancer pathogenesis by promoting tumor cell migration. |
| P08253 | 72 kDa type IV collagenase | MMP2 | 0.535 | 3.07E-02 | Involved in diverse functions such as remodeling of the vasculature, angiogenesis, tissue repair, tumor invasion, inflammation, and atherosclerotic plaque rupture. |
| Q9Y653 | Adhesion G-protein coupled receptor G1 | ADGRG1 | 0.225 | 3.33E-02 | Involved in cell adhesion and probably in cell-cell interactions and mediates cell matrix adhesion in developing neurons and hematopoietic stem cells. |

PE: preeclampsia.

**Table 3** Upregulated proteins in resting state (Pregnant women with PE/Healthy pregnant women, *P*<.05)

| **Uniprot ID** | **Protein name** | **Gene name** | **Fold change** | ***P* value** | **Function** |
| --- | --- | --- | --- | --- | --- |
| P32119 | Peroxiredoxin-2 | PRDX2 | 6.373 | 1.45E-03 | Might participate in the signaling cascades of growth factors and tumor necrosis factor-alpha by regulating the intracellular concentrations of H2O2. |
| P00915 | Carbonic anhydrase 1 | CA1 | 6.386 | 4.45E-03 | Can hydrates cyanamide to urea. |
| P04040 | Catalase | CAT | 2.336 | 3.32E-02 | Promotes growth of cells including T-cells, B-cells, myeloid leukemia cells, melanoma cells, mastocytoma cells and normal and transformed fibroblast cells. |
| P16157 | Ankyrin-1 | ANK1 | 3.915 | 2.14E-02 | Positive regulation of organelle organization. |
| P05109 | Protein S100-A8 | S100A8 | 5.419 | 3.89E-02 | S100A8 is a calcium- and zinc-binding protein which plays a prominent role in the regulation of inflammatory processes and immune response. |
| P30043 | Flavin reductase (NADPH) | BLVRB | 4.894 | 3.89E-02 | broad specificity oxidoreductase that catalyzes the NADPH-dependent reduction of a variety of flavins, such as riboflavin, FAD or FMN, biliverdins, methemoglobin and PQQ (pyrroloquinoline quinone). |
| P11166 | Solute carrier family 2, facilitated glucose transporter member 1 | SLC2A1 | 8.039 | 1.25E-03 | Involved in female pregnancy and responsible for constitutive or basal glucose uptake . |
| P30613 | Pyruvate kinase PKLR | PKLR | 4.269 | 1.64E-02 | Plays a key role in glycolysis and involved in ATP biosynthetic process. |
| O15067 | Phosphoribosylformylglycinamidine synthase | PFAS | 3.173 | 4.97E-02 | Involved in ATP binding and metal ion binding. |
| P15374 | Ubiquitin carboxyl-terminal hydrolase isozyme L3 | UCHL3 | 2.263 | 2.64E-02 | Involved in post-translational protein modification |
| Q93009 | Ubiquitin carboxyl-terminal hydrolase 7 | USP7 | 3.359 | 2.13E-02 | Deubiquitinates p53/TP53, preventing degradation of p53/TP53, and enhances p53/TP53-dependent transcription regulation, cell growth repression and apoptosis. |
| O43242 | 26S proteasome non-ATPase regulatory subunit 3 | PSMD3 | 1.915 | 3.70E-02 | This complex plays a key role in the maintenance of protein homeostasis by removing misfolded or damaged proteins, which could impair cellular functions, and by removing proteins whose functions are no longer required. |
| Q16775 | Hydroxyacylglutathione hydrolase, mitochondrial | HAGH | 2.293 | 1.33E-02 | Mediates glutathione biosynthetic process. |
| P35754 | Glutaredoxin-1 | GLRX | 2.702 | 1.82E-02 | Positive regulation of membrane potential. |
| Q13228 | Methanethiol oxidase | SELENBP1 | 11.112 | 4.28E-03 | May be involved in intra-Golgi protein transport and related to circulating IL-6 and CRP. |
| Q99598 | Translin-associated protein X | TSNAX | 4.115 | 2.62E-02 | Acts in combination with TSN as an endonuclease involved in the activation of the RNA-induced silencing complex. |
| P49720 | Proteasome subunit beta type-3 | PSMB3 | 2.123 | 4.38E-02 | mediates proteasomal ubiquitin-independent protein catabolic process. |
| P08174 | Complement decay-accelerating factor | CD55 | 1.815 | 2.01E-02 | Involved in complement activation (classical pathway) and innate immune response. |
| P62263 | 40S ribosomal protein S14 | RPS14 | 6.921 | 4.67E-02 | Negative regulation of transcription by RNA polymerase II. |
| Q96QF0 | Rab-3A-interacting protein | RAB3IP | 3.880 | 4.87E-02 | Involved in Golgi to plasma membrane transport. |
| O75592 | E3 ubiquitin-protein ligase MYCBP2 | MYCBP2 | 5.441 | 1.35E-02 | Positive regulation of protein ubiquitination. |
| Q6UX06 | Olfactomedin-4 | OLFM4 | 6.755 | 1.73E-02 | Facilitates cell adhesion, most probably through interaction with cell surface lectins and cadherin. |
| Q9Y6G9 | Cytoplasmic dynein 1 light intermediate chain 1 | DYNC1LI1 | 7.438 | 2.03E-02 | Hydrolyzes the inositol phosphate linkage in proteins anchored by phosphatidylinositol glycans (GPI-anchor) thus releasing these proteins from the membrane. |
| P13646 | Keratin, type I cytoskeletal 13 | KRT13 | 25.688 | 1.44E-02 | Involved in cytoskeleton organization. |

PE: preeclampsia.

**Table 4** Downregulated proteins in activated state (Pregnant women with PE/Healthy pregnant women, *P*<.05)

| **Uniprot ID** | **Protein name** | **Gene name** | **Fold change** | ***P* value** | **Function** |
| --- | --- | --- | --- | --- | --- |
| P02787 | Serotransferrin | TF | 0.381 | 2.05E-02 | Involved in cell proliferation. |
| P01023 | Alpha-2-macroglobulin | A2M | 0.436 | 4.37E-02 | Involved in complement activation. |
| P00450 | Ceruloplasmin | CP | 0.414 | 2.84E-02 | Involved in iron ion transport. |
| P01024 | Complement C3 | C3 | 0.459 | 1.50E-02 | Involved in immune and inflammatory response, complement activation and apoptotic process. |
| P02774 | Vitamin D-binding protein | GC | 0.370 | 3.46E-03 | Involved in vitamin D transport and storage, scavenging of extracellular G-actin, enhancement of the chemotactic activity of C5 alpha for neutrophils in inflammation and macrophage activation. |
| P01019 | Angiotensinogen | AGT | 0.337 | 2.23E-02 | Has an antithrombotic effect that involves MAS1-mediated release of nitric oxide from platelets. |
| P02765 | Alpha-2-HS-glycoprotein | AHSG | 0.525 | 2.69E-02 | Positive regulation of phagocytosis. |
| P02749 | Beta-2-glycoprotein 1 | APOH | 0.492 | 4.17E-02 | blood coagulation, intrinsic pathway. |
| P01042 | Kininogen-1 | KNG1 | 0.504 | 2.99E-03 | involved in blood coagulation and apoptotic process. |
| P0C0L4 | Complement C4-A | C4A | 0.361 | 4.72E-02 | involved in complement activation, classical pathway. |
| Q14624 | Inter-alpha-trypsin inhibitor heavy chain H4 | ITIH4 | 0.531 | 2.54E-03 | response to cytokine. |
| P04217 | Alpha-1B-glycoprotein | A1BG | 0.395 | 4.25E-02 | involved in immune response. |
| P62873 | Guanine nucleotide-binding protein G(I)/G(S)/G(T) subunit beta-1 | GNB1 | 0.132 | 2.70E-03 | Involved as a modulator or transducer in various transmembrane signaling systems. |
| P08185 | Corticosteroid-binding globulin | SERPINA6 | 0.341 | 8.74E-03 | major transport protein for glucocorticoids and progestins in the blood of almost all vertebrate species. |
| P00747 | Plasminogen | PLG | 0.465 | 3.91E-03 | Dissolves the fibrin of blood clots and acts as a proteolytic factor in a variety of other processes including embryonic development, tissue remodeling, tumor invasion, and inflammation. |
| P01593 | Immunoglobulin kappa variable 1D-33 | IGKV1D-33 | 0.436 | 1.98E-02 | mediates adaptive immune response. |
| P23142 | Fibulin-1 | FBLN1 | 0.412 | 4.06E-02 | Mediates blood coagulation, fibrin clot formation and embryo implantation. |
| P04114 | Apolipoprotein B-100 | APOB | 0.431 | 3.60E-02 | Positive regulation of gene expression and lipid storage. |
| P19652 | Alpha-1-acid glycoprotein 2 | ORM2 | 0.282 | 2.35E-02 | Positive regulation of interleukin-1 beta production. |
| P27169 | Serum paraoxonase/arylesterase 1 | PON1 | 0.410 | 1.47E-02 | Mediates an enzymatic protection of low density lipoproteins against oxidative modification and the consequent series of events leading to atheroma formation. |
| P43652 | Afamin | AFM | 0.412 | 2.27E-02 | Mediates vitamin E and zinc ion binding. |
| P04278 | Sex hormone-binding globulin | SHBG | 0.426 | 2.61E-02 | Functions as an a2ndrogen transport protein, but may also be involved in receptor mediated processes. |
| Q08380 | Galectin-3-binding protein | LGALS3BP | 0.381 | 1.87E-02 | Promotes integrin-mediated cell adhesion. May stimulate host defense against viruses and tumor cells. |
| Q14520 | Hyaluronan-binding protein 2 | HABP2 | 0.413 | 4.39E-03 | Mediates cell adhesion and proteolysis |
| P01598 | Immunoglobulin kappa variable 1-5 | IGKV1-5 | 0.103 | 9.96E-03 | Involved in adaptive immune response. |
| Q15628 | Tumor necrosis factor receptor type 1-associated DEATH domain protein | TRADD | 0.048 | 1.97E-02 | Mediates apoptotic process and cellular response to tumor necrosis factor. |
| P22792 | Carboxypeptidase N subunit 2 | CPN2 | 0.557 | 4.39E-02 | involved in protein stabilization |
| P05546 | Heparin cofactor 2 | SERPIND1 | 0.342 | 2.20E-03 | Involved in blood coagulation, chemotaxis and negative regulation of endopeptidase activity. |
| P00748 | Coagulation factor XII | F12 | 0.517 | 9.09E-04 | Involved in blood coagulation (intrinsic pathway) and Factor XII activation. |
| O15117 | FYN-binding protein 1 | FYB1 | 0.515 | 2.12E-02 | May play a role in linking T-cell signaling to remodeling of the actin cytoskeleton. |
| P05543 | Thyroxine-binding globulin | SERPINA7 | 0.447 | 1.74E-02 | Major thyroid hormone transport protein in serum. |
| P30740 | Leukocyte elastase inhibitor | SERPINB1 | 0.455 | 4.78E-03 | [Negative regulation of interleukin-1 beta production](https://www.ebi.ac.uk/QuickGO/term/GO:0032691). |
| Q15293 | Reticulocalbin-1 | RCN1 | 0.197 | 2.34E-02 | May regulate calcium-dependent activities in the endoplasmic reticulum lumen or post-ER compartment. |
| P03952 | Plasma kallikrein | KLKB1 | 0.350 | 2.55E-02 | Mediates blood coagulation, Factor XII activation and fibrinolysisformation. |
| P55884 | Eukaryotic translation initiation factor 3 subunit B | EIF3B | 0.159 | 1.46E-02 | Regulation of translational initiation. |
| P23083 | Immunoglobulin heavy variable 1-2 | IGHV1-2 | 0.176 | 5.81E-05 | Involved in defense response to bacterium and immune response. |
| P80108 | Phosphatidylinositol-glycan-specific phospholipase D | GPLD1 | 0.338 | 3.22E-02 | Hydrolyzes the inositol phosphate linkage in proteins anchored by phosphatidylinositol glycans (GPI-anchor) thus releasing these proteins from the membrane. |
| P13671 | Complement component C6 | C6 | 0.544 | 2.39E-02 | Plays a key role in the innate and adaptive immune response by forming pores in the plasma membrane of target cells. |
| Q9UGM5 | Fetuin-B | FETUB | 0.326 | 8.75E-04 | Involved in negative regulation of endopeptidase activity and single fertilization. |
| O43182 | Rho GTPase-activating protein 6 | ARHGAP6 | 0.350 | 3.22E-02 | Positive regulation of phospholipase activity and small GTPase mediated signal transduction. |
| O75636 | Ficolin-3 | FCN3 | 0.298 | 2.34E-02 | May function in innate immunity through activation of the lectin complement pathway. |
| Q8NBF2 | NHL repeat-containing protein 2 | NHLRC2 | 0.215 | 1.35E-02 | Required for normal embryonic development. |
| O43572 | A-kinase anchor protein 10, mitochondrial | AKAP10 | 0.191 | 4.75E-05 | Protein localization and signal transduction. |
| P05160 | Coagulation factor XIII B chain | F13B | 0.374 | 1.75E-02 | Mediates blood coagulation. |
| Q5JSH3 | WD repeat-containing protein 44 | WDR44 | 0.129 | 9.22E-04 | May be involved in vesicle recycling. |
| P29622 | Kallistatin | SERPINA4 | 0.341 | 1.76E-03 | Inhibits human amidolytic and kininogenase activities of tissue kallikrein. |
| P10643 | Complement component C7 | C7 | 0.351 | 1.56E-02 | Plays a key role in the innate and adaptive immune response by forming pores in the plasma membrane of target cells. |
| Q96IY4 | Carboxypeptidase B2 | CPB2 | 0.259 | 3.06E-03 | Mediates blood coagulation, cellular response to glucose stimulus and fibrinolysis. |
| Q9NZP8 | Complement C1r subcomponent-like protein | C1RL | 0.590 | 4.30E-02 | Mediates complement activation, classical pathway and innate immune response. |
| O95674 | Phosphatidate cytidylyltransferase 2 | CDS2 | 0.395 | 2.48E-02 | Mediates lipid droplet formation and phosphatidylglycerol biosynthetic process. |
| O00187 | Mannan-binding lectin serine protease 2 | MASP2 | 0.377 | 3.30E-02 | Plays an important role in the activation of the complement system via mannose-binding lectin. |
| O15031 | Plexin-B2 | PLXNB2 | 0.251 | 3.23E-02 | Plays an important role in cell-cell signaling. |
| P04207 | Immunoglobulin kappa variable 3-15 | P04207 | 0.171 | 6.81E-03 | participates in the antigen recognition |
| P22352 | Glutathione peroxidase 3 | GPX3 | 0.361 | 4.67E-02 | Protects cells and enzymes from oxidative damage, by catalyzing the reduction of hydrogen peroxide, lipid peroxides and organic hydroperoxide, by glutathione. |
| P49841 | Glycogen synthase kinase-3 beta | GSK3B | 0.299 | 4.17E-02 | ATP, NF-kappaB and p53 binding. |
| Q9UK55 | Protein Z-dependent protease inhibitor | SERPINA10 | 0.440 | 9.71E-03 | Inhibits activity of the coagulation protease factor Xa in the presence of PROZ, calcium and phospholipids, also inhibits factor XIa in the absence of cofactors. |
| Q9Y259 | Choline/ethanolamine kinase | CHKB | 0.208 | 2.38E-03 | Has a key role in phospholipid metabolism, and catalyzes the first step of phosphatidylethanolamine and phosphatidylcholine biosynthesis. |
| P01708 | Immunoglobulin lambda variable 2-11 | IGLV2-11 | 0.209 | 3.35E-02 | Involved in adaptive immune response. |
| P01605 | Immunoglobulin kappa variable 1D-33 | IGKV1D-33 | 0.128 | 9.08E-04 | Involved in adaptive immune response. |
| Q9UIQ6 | Leucyl-cystinyl aminopeptidase | LNPEP | 0.274 | 1.93E-02 | May be involved in the inactivation of neuronal peptides in the brain. Cleaves Met-enkephalin and dynorphin. |
| Q13287 | N-myc-interactor | NMI | 0.201 | 2.26E-02 | Acts as a signaling pathway regulator involved in innate immune system response. |
| Q8WZA0 | Protein LZIC | LZIC | 0.505 | 3.88E-02 | Involved in beta-catenin binding. |
| P01612 | Immunoglobulin kappa variable 1-39 | P01612 | 0.089 | 2.08E-03 | Mediates adaptive immune response. |
| P01880 | Immunoglobulin heavy constant delta | IGHD | 0.063 | 9.92E-03 | Involved in antigen binding and immunoglobulin receptor binding. |
| P51858 | Hepatoma-derived growth factor | HDGF | 0.198 | 4.18E-02 | Acts as a transcriptional repressor, has mitogenic activity for fibroblasts. |
| Q5K651 | Sterile alpha motif domain-containing protein 9 | SAMD9 | 0.074 | 1.73E-03 | May play a role in the inflammatory response to tissue injury and the control of extra-osseous calcification, acting as a downstream target of TNF-alpha signaling. |
| Q32MZ4 | Leucine-rich repeat flightless-interacting protein 1 | LRRFIP1 | 0.384 | 4.00E-02 | May regulate expression of TNF, EGFR and PDGFA. |
| P14209 | CD99 antigen | CD99 | 0.042 | 3.12E-02 | positive regulation of neutrophil and T cell extravasation |
| Q15582 | Transforming growth factor-beta-induced protein ig-h3 | TGFBI | 0.308 | 2.16E-02 | Plays a role in cell adhesion and may play a role in cell-collagen interactions. |
| P17936 | Insulin-like growth factor-binding protein 3 | IGFBP3 | 0.201 | 1.08E-02 | Mediates protein phosphorylation and apoptotic process. |
| Q6H9L7 | Isthmin-2 | ISM2 | 0.189 | 1.08E-02 | Involved in adaptive immune response |
| O75460 | Serine/threonine-protein kinase/endoribonuclease IRE1 | ERN1 | 0.143 | 2.94E-03 | Involved inADP binding, endoribonuclease activity and enzyme binding. |
| P04206 | Immunoglobulin kappa variable 3-20 | IGKV3-20 | 0.308 | 1.99E-02 | Mediates adaptive immune response, antibacterial humoral response, glomerular filtration and immune response. |
| P04156 | Major prion protein | PRNP | 0.388 | 3.71E-02 | Response to oxidative stress. |
| Q15796 | Mothers against decapentaplegic homolog 2 | SMAD2 | 0.197 | 4.04E-02 | Mediates ubiquitin protein ligase binding. |
| Q6UXB8 | Peptidase inhibitor 16 | PI16 | 0.227 | 6.28E-03 | May inhibit cardiomyocyte growth. |
| Q53QZ3 | Rho GTPase-activating protein 15 | ARHGAP15 | 0.079 | 1.36E-02 | Regulation of cell shape and GTPase activity. |
| P05019 | Insulin-like growth factor I | IGF1 | 0.017 | 1.11E-07 | Activation of MAPK activity and protein kinase B activity |
| Q9Y217 | Myotubularin-related protein 6 | MTMR6 | 0.011 | 5.61E-04 | Negatively regulates proliferation of reactivated CD4+ T-cells. |
| Q9Y263 | Phospholipase A-2-activating protein | PLAA | 0.347 | 4.91E-02 | Plays a role in protein ubiquitination, sorting and degradation |
| O14727 | Apoptotic protease-activating factor 1 | APAF1 | 0.297 | 3.20E-02 | Involved in intrinsic apoptotic signaling pathway |
| Q9Y6R7 | IgGFc-binding protein | FCGBP | 0.454 | 2.39E-02 | May be involved in the maintenance of the mucosal structure as a gel-like component of the mucosa. |
| A1A4S6 | Rho GTPase-activating protein 10 | ARHGAP10 | 0.397 | 1.27E-02 | Negative regulation of apoptotic process. |
| Q96H20 | Vacuolar-sorting protein SNF8 | SNF8 | 0.298 | 4.17E-02 | Positive regulation of protein catabolic process. |
| P01776 | Immunoglobulin heavy variable 3-23 | IGHV3-23 | 0.102 | 1.11E-04 | Mediates complement activation, classical pathway. |
| Q9Y6K9 | NF-kappa-B essential modulator | IKBKG | 0.082 | 2.82E-02 | Mediates apoptotic process and immune response. |
| Q86SQ4 | Adhesion G-protein coupled receptor G6 | ADGRG6 | 0.096 | 1.29E-02 | Involved in collagen binding and endopeptidase activity |
| Q99447 | Ethanolamine-phosphate cytidylyltransferase | PCYT2 | 0.101 | 3.38E-02 | Involved in phosphatidylethanolamine biosynthetic process. |
| O75821 | Eukaryotic translation initiation factor 3 subunit G | EIF3G | 0.131 | 1.94E-02 | Formation of cytoplasmic translation initiation complex. |
| Q9NQ79 | Cartilage acidic protein 1 | CRTAC1 | 0.079 | 2.13E-02 | Involved in calcium ion binding. |
| Q86XA9 | HEAT repeat-containing protein 5A | HEATR5A | 0.145 | 3.47E-02 | Endocytosis and retrograde transport, endosome to Golgi. |
| Q71RC9 | Small integral membrane protein 5 | SMIM5 | 0.310 | 4.93E-02 | Intrinsic component of membrane. |
| Q96EM0 | Trans-3-hydroxy-L-proline dehydratase | L3HYPDH | 0.566 | 4.78E-02 | Metabolic process. |
| P15151 | Poliovirus receptor | PVR | 0.194 | 1.30E-02 | Positive regulation of natural killer cell mediated cytotoxicity and natural killer (NK) cell mediated cytotoxicity directed against tumor cell target. |
| P43250 | G protein-coupled receptor kinase 6 | GRK6 | 0.135 | 3.66E-02 | Involved in protein phosphorylation and regulation of G protein-coupled receptor signaling pathway. |
| Q9UHJ6 | Sedoheptulokinase | SHPK | 0.110 | 3.07E-02 | Involved in ATP binding and phosphotransferase activity. |
| Q15814 | Tubulin-specific chaperone C | TBCC | 0.055 | 3.33E-02 | protein folding, tubulin complex assembly. |
| Q5T2D2 | Trem-like transcript 2 protein | TREML2 | 0.018 | 3.36E-02 | Involved in T cell activation. |
| Q9BYM8 | RanBP-type and C3HC4-type zinc finger-containing protein 1 | RBCK1 | 0.143 | 2.38E-02 | Involved in activation of the canonical NF-kappa-B and the JNK signaling pathways. |
| P60604 | Ubiquitin-conjugating enzyme E2 G2 | UBE2G2 | 0.339 | 1.68E-02 | Negative regulation of retrograde protein transport, ER to cytosol. |
| Q04771 | Activin receptor type-1 | ACVR1 | 0.360 | 4.20E-02 | Activate non-canonical pathways such as p38 mitogen-activated protein kinases/MAPKs. |
| P51114 | Fragile X mental retardation syndrome-related protein 1 | FXR1 | 0.157 | 2.83E-04 | Mediates apoptotic process, mRNA stability and cell differentiation. |
| Q5T2E6 | Armadillo-like helical domain-containing protein 3 | ARMH3 | 0.111 | 2.91E-02 | Involved in GBF1 recruitment, Golgi maintenance and protein secretion. |
| Q9ULL4 | Plexin-B3 | PLXNB3 | 0.521 | 4.36E-02 | Positive regulation of axonogenesis and endothelial cell proliferation. |
| Q9NRA1 | Platelet-derived growth factor C | PDGFC | 0.126 | 4.29E-02 | Positive regulation of protein autophosphorylation. |
| Q13614 | Myotubularin-related protein 2 | MTMR2 | 0.250 | 4.21E-02 | Negative regulation of receptor catabolic process negative ation. |
| O60547 | GDP-mannose 4,6 dehydratase | GMDS | 0.146 | 2.01E-02 | Involved in 'de novo' GDP-L-fucose biosynthetic process and GDP-mannose metabolic process. |
| Q96C19 | EF-hand domain-containing protein D2 | EFHD2 | 0.278 | 4.62E-02 | Plays a role as negative regulator of the canonical NF-kappa-B-activating branch and controls spontaneous apoptosis through the regulation of BCL2L1 abundance. |
| O75170 | Serine/threonine-protein phosphatase 6 regulatory subunit 2 | PPP6R2 | 0.552 | 4.11E-02 | Protein phosphatase regulator activity |
| O95295 | SNARE-associated protein Snapin | SNAPIN | 0.347 | 4.62E-02 | A complex that is required for normal biogenesis of lysosome-related organelles (LRO), such as platelet dense granules and melanosomes. |
| Q9UPY6 | Wiskott-Aldrich syndrome protein family member 3 | WASF3 | 0.104 | 1.22E-02 | Plays a role in the regulation of cell morphology and cytoskeletal organization and is required in the control of cell shape. |
| Q9Y281 | Cofilin-2 | CFL2 | 0.134 | 3.50E-02 | Involved in actin filament depolymerization and actin filament fragmentation. |
| Q9Y237 | Peptidyl-prolyl cis-trans isomerase NIMA-interacting 4 | PIN4 | 0.334 | 3.26E-02 | Involved as a ribosomal RNA processing factor in ribosome biogenesis. |
| Q8WV99 | AN1-type zinc finger protein 2B | ZFAND2B | 0.164 | 3.22E-02 | Plays a role in protein homeostasis by regulating both the translocation and the ubiquitin-mediated proteasomal degradation of nascent proteins at the endoplasmic reticulumMet-enkephalin and dynorphin. |
| P45985 | Dual specificity mitogen-activated protein kinase kinase 4 | MAP2K4 | 0.110 | 3.96E-02 | Acts as an essential component of the MAP kinase signal transduction pathway. |
| P07333 | Macrophage colony-stimulating factor 1 receptor | CSF1R | 0.268 | 3.21E-02 | ATP binding, cytokine binding. |
| Q9GZP8 | Immortalization up-regulated protein | IMUP | 0.110 | 6.93E-04 | Involved in structure-specific DNA binding. |
| Q02790 | Peptidyl-prolyl cis-trans isomerase FKBP4 | FKBP4 | 0.081 | 3.89E-02 | May have a protective role against oxidative stress in mitochondria. |
| Q9P0J7 | E3 ubiquitin-protein ligase KCMF1 | KCMF1 | 0.031 | 3.88E-03 | Promotes ubiquitination. |
| O60784 | Target of Myb protein 1 | TOM1 | 0.290 | 3.33E-02 | Involved in intracellular trafficking; probable association with membranes. |
| P51648 | Aldehyde dehydrogenase family 3 member A2 | ALDH3A2 | 0.112 | 2.12E-02 | Catalyzes the oxidation of medium and long chain aliphatic aldehydes to fatty acids. |
| Q8IZD0 | Sterile alpha motif domain-containing protein 14 | SAMD14 | 0.214 | 6.75E-04 | Involved in calcium-mediated signaling. |
| O95425 | Supervillin | SVIL | 0.270 | 3.67E-04 | May play a role in invadopodial function. |
| Q86VB7 | Scavenger receptor cysteine-rich type 1 protein M130 | CD163 | 0.080 | 2.70E-02 | Involved in acute-phase response. |
| P04066 | Tissue alpha-L-fucosidase | FUCA1 | 0.495 | 1.16E-02 | Involved in glycoside metabolic process. |
| Q13620 | Cullin-4B | CUL4B | 0.151 | 2.04E-02 | Involved in protein ubiquitination, cellular response to DNA damage stimulus. |
| Q9H1Z4 | WD repeat-containing protein 13 | WDR13 | 0.173 | 3.22E-02 | Negative regulation of cell proliferation. |
| Q6PHR2 | Serine/threonine-protein kinase ULK3 | ULK3 | 0.281 | 4.81E-02 | Inactivating the protein kinase activity and preventing phosphorylation of GLI proteins. |
| Q9BU02 | Thiamine-triphosphatase | THTPA | 0.045 | 1.52E-02 | Involved in thiamine metabolic process. |
| O95861 | 3'(2'),5'-bisphosphate nucleotidase 1 | BPNT1 | 0.068 | 2.07E-02 | Involved in glycerophospholipid metabolic process. |
| Q9H5N1 | Rab GTPase-binding effector protein 2 | RABEP2 | 0.120 | 8.67E-03 | Plays a role in membrane trafficking and in homotypic early endosome fusion. |
| Q9UKW4 | Guanine nucleotide exchange factor VAV3 | VAV3 | 0.351 | 3.23E-02 | Involved in Fc-gamma receptor signaling pathway. |
| Q96N67 | Dedicator of cytokinesis protein 7 | DOCK7 | 0.206 | 1.70E-02 | Involved in activation of GTPase activity. |
| Q15166 | Serum paraoxonase/lactonase 3 | PON3 | 0.291 | 2.69E-02 | Negative regulation of superoxide anion generation. |
| Q96DX5 | Ankyrin repeat and SOCS box protein 9 | ASB9 | 0.115 | 3.22E-02 | This protein is involved in the pathway protein ubiquitination. |
| P62341 | Thioredoxin reductase-like selenoprotein T | SELENOT | 0.126 | 4.50E-02 | Protects dopaminergic neurons against oxidative stress ans cell death. |
| Q96C90 | Protein phosphatase 1 regulatory subunit 14B | PPP1R14B | 0.192 | 1.11E-02 | Inhibitor of PPP1CA. Has over 50-fold higher inhibitory activity when phosphorylated. |
| P01601 | Immunoglobulin kappa variable 1D-16 | IGKV1D-16 | 0.189 | 1.74E-02 | Involved in adaptive immune response. |
| Q16621 | Transcription factor NF-E2 45 kDa subunit | NFE2 | 0.271 | 1.23E-02 | Component of the NF-E2 complex essential for regulating erythroid and megakaryocytic maturation and differentiation. |
| Q96Q11 | CCA tRNA nucleotidyltransferase 1, mitochondrial | TRNT1 | 0.214 | 1.61E-02 | Involved in ATP, tRNA binding. |
| P01716 | Immunoglobulin lambda variable 3-1 | IGLV3-1 | 0.202 | 1.54E-02 | Involved in adaptive immune response. |
| Q9NY97 | N-acetyllactosaminide beta-1,3-N-acetylglucosaminyltransferase 2 | B3GNT2 | 0.080 | 1.71E-02 | This protein is involved in the pathway protein glycosylation, which is part of protein modification. |
| Q9BSQ5 | Cerebral cavernous malformations 2 protein | CCM2 | 0.508 | 4.96E-02 | Stress-activated MAPK cascade, integrin-mediated signaling |
| Q9H0F6 | Sharpin | SHARPIN | 0.492 | 6.31E-03 | Plays a key role in NF-kappa-B activation and regulation of inflammation. |
| Q92963 | GTP-binding protein Rit1 | RIT1 | 0.100 | 2.15E-02 | Involved in GDP binding, GTPase activity and GTP binding. |
| P09172 | Dopamine beta-hydroxylase | DBH | 0.049 | 4.87E-02 | Regulation of cell population proliferation and extrinsic apoptotic signaling pathway. |
| P12110 | Collagen alpha-2(VI) chain | COL6A2 | 0.062 | 1.88E-02 | Mediates collagen binding and cell adhesion. |
| Q12860 | Contactin-1 | CNTN1 | 0.116 | 3.26E-02 | Mediates cell surface interactions during nervous system development. |
| P35270 | Sepiapterin reductase | SPR | 0.019 | 1.06E-03 | Involved in nitric oxide biosynthetic process. |

PE: preeclampsia.

**Table 5** Upregulated proteins in activated state (Pregnant women with PE/Healthy pregnant women, *P*<.05)

| **Uniprot ID** | **Protein name** | **Gene name** | **Fold change** | ***P* value** | **Function** |
| --- | --- | --- | --- | --- | --- |
| P32119 | Peroxiredoxin-2 | PRDX2 | 3.915 | 2.14E-02 | Might participate in the signaling cascades of growth factors and tumor necrosis factor-alpha by regulating the intracellular concentrations of H2O2. |
| P00915 | Carbonic anhydrase 1 | CA1 | 5.419 | 3.89E-02 | Can hydrates cyanamide to urea. |
| P04040 | Flavin reductase (NADPH) | CAT | 4.894 | 3.89E-02 | Positive regulation of organelle organization. |
| P27105 | Stomatin | STOM | 8.039 | 4.39E-02 | Positive regulation of protein targeting to membrane and viral process. |
| P16157 | Ankyrin-1 | ANK1 | 4.269 | 3.15E-02 | Positive regulation of organelle organization. |
| P05109 | Protein S100-A8 | S100A8 | 3.173 | 1.77E-02 | S100A8 is a calcium- and zinc-binding protein which plays a prominent role in the regulation of inflammatory processes and immune response. |
| P30043 | Flavin reductase (NADPH) | BLVRB | 2.263 | 4.73E-03 | Broad specificity oxidoreductase that catalyzes the NADPH-dependent reduction of a variety of flavins, such as riboflavin, FAD or FMN, biliverdins, methemoglobin and PQQ (pyrroloquinoline quinone). |
| P14543 | Nidogen-1 | NID1 | 3.359 | 4.81E-02 | binds to collagen IV and perlecan and probably has a role in cell-extracellular matrix interactions.degradation of p53/TP53, and enhances p53/TP53-dependent transcription regulation, cell growth repression and apoptosis. |
| O75718 | Cartilage-associated protein | CRTAP | 1.915 | 9.27E-04 | Negative regulation of post-translational protein modification. |
| P04179 | Superoxide dismutase [Mn], mitochondrial | SOD2 | 11.112 | 2.62E-02 | Involved in oxygen binding and superoxide dismutase activity. |
| Q96DZ9 | CKLF-like MARVEL transmembrane domain-containing protein 5 | CMTM5 | 1.815 | 1.56E-02 | A novel family of proteins linking classical chemokines and the transmembrane 4 superfamily (TM4SF). |
| P11166 | Solute carrier family 2, facilitated glucose transporter member 1 | SLC2A1 | 6.921 | 8.41E-04 | Involved in female pregnancy and responsible for constitutive or basal glucose uptake . |
| P21796 | Voltage-dependent anion-selective channel protein 1 | VDAC1 | 6.755 | 2.28E-02 | Forms a channel through the mitochondrial outer membrane and also the plasma membrane and allows diffusion of small hydrophilic molecules and apoptosis. |
| Q9H3N1 | Thioredoxin-related transmembrane protein 1 | TMX1 | 2.393 | 3.96E-02 | May participate in various redox reactions through the reversible oxidation of its active center dithiol to a disulfide and catalyze dithiol-disulfide exchange reactions. |
| Q9Y277 | Voltage-dependent anion-selective channel protein 3 | VDAC3 | 2.293 | 2.89E-02 | Forms a channel through the mitochondrial outer membrane that allows diffusion of small hydrophilic molecules. |
| P45880 | Voltage-dependent anion-selective channel protein 2 | VDAC2 | 2.789 | 1.29E-02 | Mediates mitochondrial outer membrane permeabilization. |
| P56385 | ATP synthase subunite, mitochondrial | ATP5ME | 2.339 | 3.66E-02 | Mitochondrial membrane ATP synthase (F1F0 ATP synthase or Complex V) produces ATP from ADP in the presence of a proton gradient across the membrane which is generated by electron transport complexes of the respiratory chain. |
| P15374 | Ubiquitin carboxyl-terminal hydrolase isozyme L3 | UCHL3 | 2.247 | 4.52E-02 | Involved in post-translational protein modification. |
| P20073 | Annexin A7 | ANXA7 | 2.395 | 1.75E-02 | Calcium/phospholipid-binding protein which promotes membrane fusion and is involved in exocytosis. |
| Q16775 | Hydroxyacylglutathione hydrolase,  mitochondrial | HAGH | 2.449 | 4.38E-02 | Mediates glutathione biosynthetic process. |
| P35754 | Glutaredoxin-1 | GLRX | 2.628 | 1.85E-02 | Has a glutathione-disulfide oxidoreductase activity in the presence of NADPH and glutathione reductase and reduces low molecular weight disulfides and proteins. |
| Q13228 | Methanethiol oxidase | SELENBP1 | 6.916 | 4.89E-03 | May be involved in intra-Golgi protein transport and related to circulating IL-6 and CRP. |
| Q6Y7W6 | GRB10-interacting GYF protein 2 | GIGYF2 | 7.230 | 3.86E-02 | May act cooperatively with GRB10 to regulate tyrosine kinase receptor signaling, including IGF1 and insulin receptors. |
| Q5TDH0 | Protein DDI1 homolog 2 | DDI2 | 2.856 | 4.89E-02 | Promots release of NFE2L1/NRF1 from the endoplasmic reticulum membrane. |
| O75947 | ATP synthase subunit d, mitochondrial | ATP5PD | 2.129 | 4.01E-02 | Produces ATP from ADP . |
| Q9H2U2 | Inorganic pyrophosphatase 2, mitochondrial | PPA2 | 2.097 | 4.76E-02 | Essential for correct regulation of mitochondrial membrane potential, and mitochondrial organization and function |
| O43169 | Cytochrome b5 type B | CYB5B | 2.461 | 5.57E-03 | Mediates nitric oxide biosynthetic process and response to oxidative stress. |
| P08133 | Annexin A6 | ANXA6 | 8.622 | 3.63E-02 | May associate with CD21. May regulate the release of Ca2+ from intracellular stores. |
| Q96QF0 | Rab-3A-interacting protein | RAB3IP | 4.022 | 3.04E-02 | Involved in Golgi to plasma membrane transport. |
| Q9UJZ1 | Stomatin-like protein 2, mitochondrial | STOML2 | 3.040 | 3.16E-02 | Through regulation of the mitochondrial function may play a role into several biological processes including cell migration, cell proliferation, T-cell activation, calcium homeostasis and cellular response to stress. |
| P29122 | Proprotein convertase subtilisin/kexin type 6 | PCSK6 | 5.776 | 4.54E-02 | Involved in glycoprotein metabolic process. |
| P48506 | Glutamate--cysteine ligase catalytic subunit | GCLC | 2.770 | 1.28E-02 | Involved in blood vessel diameter maintenance and cell redox homeostasis. |
| P09669 | Cytochrome c oxidase subunit 6C | COX6C | 3.896 | 2.35E-02 | Involved in mitochondrial electron transport, cytochrome c to oxygen. |
| P51159 | Ras-related protein Rab-27A | RAB27A | 4.847 | 4.56E-02 | Required for both granule maturation and granule docking and priming at the immunologic synapse. |
| O75298 | Reticulon-2 | RTN2 | 17.208 | 3.83E-02 | Negative regulation of amyloid-beta formation and regulation of glucose import. |

PE: preeclampsia.

**Table 6** Procoagulant platelets level of three groups in resting, activated and CD39-Diannexin prevention conditions

| Groups | Procoagulant platelets /%  [M (P25, P75)] | | | |
| --- | --- | --- | --- | --- |
| Resting | Activated | CD39-DA prevention | *P* |
| Healthy non-pregnant women (n=59) | 2.70 (2.20-3.70) | 13.10 (11.10-15.50) | 1.50 (1.10-2.20) | *P*a<0.001 |
| Healthy pregnant women (n=49) | 4.40 (3.75-5.40) | 16.50 (15.10-17.35) | 1.85 (1.70-2.28) | *P*b<0.001 |
| Pregnant women with PE (n=39) | 5.20 (4.30-6.30) | 19.50 (16.10-24.20) | 2.50 (2.08-3.50) | *P*c<0.001 |

a: Healthy non-pregnant women (Activated) vs. Healthy pregnant women (CD39-Diannexin prevention); b: Healthy non-pregnant women (Activated) vs. Pregnant women with PE (CD39-Diannexin prevention); c: Healthy pregnant women (Activated) vs. Pregnant women with PE (CD39-Diannexin prevention); PE: preeclampsia, CD39-DA: CD39-Diannexin; **P*<.05.

**Table 7** PMP level of three groups in resting, activated and CD39-Diannexin prevention conditions

| Groups | PMP /μL  [M (P25, P75)] | | | |
| --- | --- | --- | --- | --- |
| Resting | Activated | CD39-DA prevention | *P* |
| Healthy non-pregnant women (n=59) | 9.00  (6.00-12.00) | 54.00  (45.00-67.00) | 31.00  (22.50-35.00) | *P*a<0.001 |
| Healthy pregnant women (n=49) | 31.00 (27.00-36.00) | 83.00  (89.00-99.00) | 44.00  (37.00-55.00) | *P*b<0.001 |
| Pregnant women with PE (n=39) | 42.00 (38.75-44.00) | 172.50  (165.00-183.00) | 55.50  (45.00-68.25) | *P*c<0.001 |

a: Healthy non-pregnant women (Activated) vs. Healthy pregnant women (CD39-Diannexin); b: Healthy non-pregnant women (Activated) vs. Pregnant women with PE (CD39-Diannexin); c: Healthy pregnant women (Activated) vs. Pregnant women with PE (CD39-Dianenxin prevention); PE: preeclampsia, PMP: platelet microparticle; CD39-DA: CD39-Diannexin; **P*<.05.

**Table 8** Mice performance of four groups

|  | Pregnant control(n=8) | Pregnant PBS treatment (n=8) | PE model (n=8) | CD39-DA prevention (n=8) | PE model vs Pregnant control | | CD39-DA prevention vs PE model | |
| --- | --- | --- | --- | --- | --- | --- | --- | --- |
| t | *P* | t | *P* |
| Blood pressure (mm/Hg) |  | | | | | | | |
| SBP | 105.75±3.99 | 105.00±3.16 | 121.38±3.78 | 113.00±3.38 | -7.25 | <.001 | 3.644 | .004 |
| MBP | 90.88±3.40 | 90.75±2.12 | 103.50±2.78 | 96.25±3.24 | -10.32 | <.001 | 4.805 | <.001 |
| DBP | 83.50±3.51 | 83.00±1.85 | 93.13±3.44 | 87.88±3.91 | -7.33 | <.001 | 2.852 | .013 |
| P/C (g/g) | 3.04±0.87 | 2.73±0.71 | 7.32±0.15 | 5.07±1.00 | 4.25 | <.001 | <0.001 | .001 |
| sFlt-1 (ng/ml) | 3.37±0.45 | 3.22±0.81 | 7.82±0.85 | 5.74±0.26 | -11.12 | <.001 | 6.649 | <.001 |
| Survival (%) | 93.46±5.81 | 91.47±7.72 | 64.67±10.30 | 81.78±8.29 | 5.89 | <.001 | -3.660 | .003 |
| Placenta diameter (mm) | 11.50±0.76 | 11.75±1.76 | 8.88±0.99 | 10.38±0.74 | 5.32 | <.001 | -3.424 | .003 |
| Embryonic length (mm) | 11.13±0.99 | 10.75±0.46 | 8.75±0.89 | 10.13±0.64 | 5.66 | <.001 | -3.556 | .003 |

PE: preeclampsia, CD39-DA: CD39-Diannexin, SBP: systolic blood pressure, MBP: medium blood pressure, DBP: diasyolic blood pressure, P/C: protein/creatine ratio, sFlt-1: soluble fms-like tyrosine kinase. **P*<.05.

**Table 9** CD39-Diannexin reduced the procoagulant platelets formation in PE mice.

| Groups | Procoagulant platelets /%  [M (P25, P75)] | |
| --- | --- | --- |
| Resting | Activated |
| Pregnant control (n=6) | 0.50 (0.43-0.90) | 14.80 (20.40-23.40) |
| Pregnant PBS treatment (n=6) | 0.55 (0.45-0.63) | 18.05 (18.90-21.20) |
| PE model (n=5) | 0.90 (0.75-1.10) | 35.60 (34.30-37.35) |
| CD39-DA prevention (n=6) | 0.60 (0.48-0.63) | 21.45 (20.38-22.23) |
| *P*a | 0.005 | |
| *P*b | 0.004 | |
| *P*c | <0.001 | |
| *P*d | <0.001 | |

a: Pregnant PBS treatment (Resting) vs. PE model (Resting); b: PE model (Resting) vs. CD39-Diannexin prevention (Resting); c: Pregnant PBS treatment (Activated) vs. PE model (Activated); d: PE model (Activated) vs. CD39-Diannexin prevention (Activated). PE: preeclampsia, CD39-DA: CD39-Diannexin.**P*<.05.
